# Supplementary material for: Preparation of zeolite-based porous materials via photopolymerization and their applications in 3D printing and gas storage
Source: Royal Society of Chemistry journal article supplement (doi:10.1039/d3qm00563a), 2023-01-01
Supplement: d3qm00563a1.pdf [file d3qm00563a1.pdf]

**Preparation of zeolite-based porous materials via  
photopolymerization and applied in 3D printing and gas storage**

*Yijun Zhang<sup>†,‡</sup>, Yuanyuan Gao<sup>†,‡</sup>, Ludovic Josien<sup>†,‡</sup>, Cyril Vaultot<sup>†,‡</sup>, Angélique Simon-Masseron<sup>†,‡\*</sup>,  
and Jacques Lalevée<sup>†,‡\*</sup>*

<sup>†</sup> Université de Haute-Alsace, CNRS, IS2M UMR 7361, F-68100 Mulhouse, France

<sup>‡</sup> Université de Strasbourg, France

---

## **Experimental Section**

### **Materials**

The monomer, Ebecryl 605, was purchased from Allnex, and 2-benzyl-2(dimethylamino)-4-morpholinobutyrophenone (BDMK) used as photoinitiator was supplied by Sigma-Aldrich. Polyethylene glycol-200 (PEG-200, molecular weight = 200 g/mol) and the dispersant MELIORAN P312L (abbreviation: D) were purchased from Sigma-Aldrich and ARKEMA respectively. LTA-5A zeolite powder (abbreviation: Z) and Al<sub>2</sub>O<sub>3</sub> powder (abbreviation: A) were purchased from ACROS ORGANICS and CONDEA respectively. The LTA-5A beads (4-8 mesh) was obtained from ACROS. Characteristics of LTA-5A, powder and commercial beads, were listed in Table S1.

### **Composite preparation *via* photopolymerization**

Firstly, Ebecryl 605, BDMK, PEG-200 and MELIORAN P312L were mixed homogenously in order to obtain monomer mixture liquid. PEG-200 and dispersant were both used to modified the viscosity and dispersibility of formulations. Then, monomer mixture liquid, LTA-5A and Al<sub>2</sub>O<sub>3</sub> were mixed at different ratios to prepare different formulations for photopolymerization (see Table S2). All mixing processes were performed through Speedmixer (DAC 150.1 FVZ-K) with rotation speed around 2000 rpm.

For photopolymerization, a mold filled with investigated formulation was placed under irradiation of LED@405nm for 30 s. Then, the sample in the mold was taken out and cleaned by acetone to remove the uncured monomer.

### **3D Printing**

A homemade 3D printer (a layer-by-layer method to deposit materials) was used to obtain 3D objects. The air pressure for injection was controlled around 1 MPa, and the deposit rate for X-axis and Y-axis was set at 1 mm.s<sup>-1</sup>. The 3D printed structured composites are shown in Figure 3.

### **Calcination**

Composites after photopolymerization were calcined at 750 °C under air (heating rate at 1 K.min<sup>-1</sup>, without air flow) for 1 h, 2 h, 4 h, and 8 h. After calcination process,

---

the shape and structure of calcined samples can remain intact, compared to their corresponding composites without calcination.

### **Characterization**

The rheology measurements were carried out by a rotational rheometer HAAKE MARS (Thermo Scientific) with a shear rate from 0.01 to 1000 s<sup>-1</sup> at 25 °C. Thermogravimetric analysis (TGA) was performed with a METTER-TOLEDO TGA/DSC3+ thermoanalyzer (heating rate at 10 K.min<sup>-1</sup>, from 30 °C to 750 °C, air flow 150 L.min<sup>-1</sup>). For dynamic thermomechanical analysis (DMA), composites after photopolymerization were polished to obtain pellets with a thickness of 0.1 cm, and then analysis were carried out on a Viscoanalyser METTLER DMAA861 at a frequency of 1.0 HZ. The crystalline structures of fillers were identified by X-ray diffraction (XRD) measurements through a PANalytical MPD X'Pert Pro diffractometer. Bear-loading tests were performed on calcined samples (diameter= 9 mm, thickness=1 mm) by using different weights (100 g, 200 g and 300 g).

N<sub>2</sub> adsorption-desorption isotherms were performed at -196 °C with Micromeritics ASAP 2420 Instrument on calcined samples, pure powder and commercial LTA-5A beads to determine their micro- and mesoporous characteristics. All samples were outgassed to a residual pressure of less than 0.8 Pa at 90 °C for 1 h and 300 °C for 15 h. Specific surface areas were calculated according to the Brunauer-Emmett-Teller (BET) method (0.01 < p/p<sup>0</sup> less than 0.03). The *t*-plot method was used to calculate microporous volume (V<sub>micro</sub>) and microporous surface area (S<sub>micro</sub>). The external surface (S<sub>ext</sub>) was obtained by subtracting S<sub>micro</sub> from the total surface. Mesopore size distributions were calculated by the Barrett-Joyner-Halenda (BJH) method on the desorption branch of the isotherm. CO<sub>2</sub> adsorption capacities of calcined samples were performed with a Micromeritics ASAP 2420 instrument at 0 °C under 105 KPa. Before measurement, samples were outgassed to a residual pressure of less than 0.8 Pa at 90 °C for 1 h and 300 °C for 15 h.

---

**Table S1. Characteristics of zeolites used in this work**

| <b>Filler</b>                          | <b>Framework Type</b> | <b>Si/Al</b> | <b>Na/Al</b> | <b>Crystal Size (av diam.)</b>        |
|----------------------------------------|-----------------------|--------------|--------------|---------------------------------------|
|                                        | <b>Code</b>           |              |              | <b>Or beads size (diam.)</b>          |
| <b>LTA-5A<br/>powder</b>               | LTA                   | 0.9          | 0.3          | (Crystals) 2.6 $\mu\text{m}$          |
| <b>LTA-5A<br/>commercial<br/>beads</b> | LTA                   | 1.3          | 0.2          | (Beads) 2.4-4.8 mm<br>(Crystals) n.d. |

---

**Table S2. Formulations for photopolymerization**

| Filler (60 wt%)                      |                 | Eberycl 605<br>(wt%) | PEG-200<br>(wt%) | Dispersant<br>(wt%) | BDMK<br>(wt%) |
|--------------------------------------|-----------------|----------------------|------------------|---------------------|---------------|
| Al <sub>2</sub> O <sub>3</sub> (wt%) | LTA-50<br>(wt%) |                      |                  |                     |               |
| 30                                   | 30              | 30.73                | 9.03             | 0                   | 0.24          |
| 15                                   | 45              | 30.73                | 9.03             | 0                   | 0.24          |
| 0                                    | 60              | 30.73                | 9.03             | 0                   | 0.24          |
| 30                                   | 30              | 29.5                 | 8.66             | 1.6                 | 0.24          |
| 15                                   | 45              | 29.5                 | 8.66             | 1.6                 | 0.24          |
| 0                                    | 60              | 29.5                 | 8.66             | 1.6                 | 0.24          |
| 30                                   | 30              | 28.16                | 8.28             | 3.32                | 0.24          |
| 15                                   | 45              | 28.16                | 8.28             | 3.32                | 0.24          |
| 0                                    | 60              | 28.16                | 8.28             | 3.32                | 0.24          |
| 30                                   | 30              | 27.01                | 7.95             | 4.8                 | 0.24          |
| 15                                   | 45              | 27.01                | 7.95             | 4.8                 | 0.24          |
| 0                                    | 60              | 27.01                | 7.95             | 4.8                 | 0.24          |
| 30                                   | 30              | 26.12                | 7.00             | 6.64                | 0.24          |
| 15                                   | 45              | 26.12                | 7.00             | 6.64                | 0.24          |
| 0                                    | 60              | 26.12                | 7.00             | 6.64                | 0.24          |

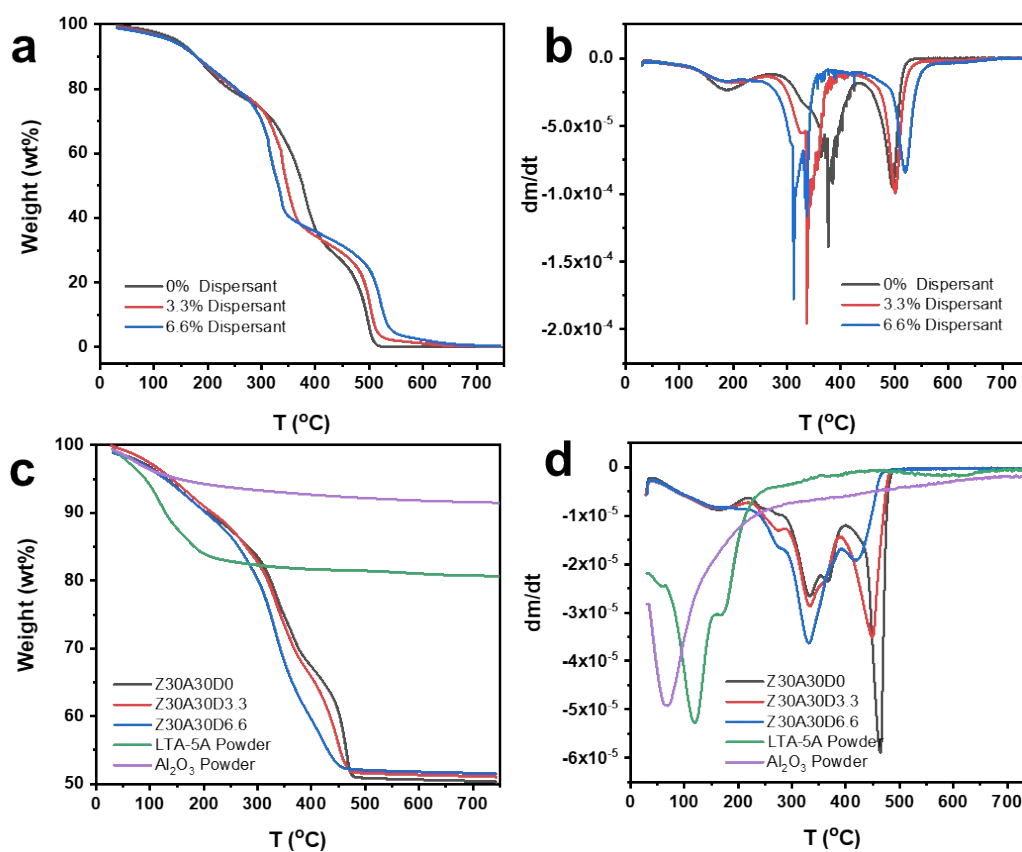

Figure S1. TGA and DTG (derivative of TGA) curves for (a, b) Z0A0D0, Z0A0D3.3 and Z0A0D6.6; (c, d) Z30A30D0, Z30A30D3.3, Z30A30D6.6, LTA-5A powder and Al<sub>2</sub>O<sub>3</sub> powder.

**Table S3. Weight loss values highlighted by TGA for LTA-5A, Al<sub>2</sub>O<sub>3</sub> and related composite materials.**

|                                                | Z0A0D               | Z0A0D               | Z0A0D               | Z30A30                      | Z30A30                     | Z30A30                      | LTA-5A          | Al <sub>2</sub> O <sub>3</sub> |
|------------------------------------------------|---------------------|---------------------|---------------------|-----------------------------|----------------------------|-----------------------------|-----------------|--------------------------------|
|                                                | 0                   | 3.3                 | 6.6                 | D0                          | D3.3                       | D6.6                        | Powder          | powder                         |
| <b>T max (°C)</b>                              | 181,<br>376,<br>493 | 181,<br>337,<br>513 | 181,<br>311,<br>519 | 166,<br>333,<br>364,<br>464 | 166,<br>273<br>333,<br>449 | 167,<br>273,<br>330,<br>420 | 58, 119,<br>169 | 68                             |
| <b>ML-1 (wt%)<sup>a</sup><br/>(50-250 °C)</b>  | 21.1                | 19.9                | 19.50               | 12.6                        | 12.3                       | 13.5                        | 17.2            | 6.3                            |
| <b>ML-2 (wt%)<sup>b</sup><br/>(250-750 °C)</b> | 78.9                | 79.9                | 80.0                | 37.1                        | 36.7                       | 35.0                        | 2.2             | 2.3                            |
| <b>FW (wt%)<sup>c</sup></b>                    | Ca. 0               | 0.28                | 0.51                | 50.3                        | 51.0                       | 51.5                        | 80.7            | 91.5                           |
| <b>FWC (wt%)<sup>d</sup></b>                   | -                   | -                   | -                   | 51.6                        | 51.8                       | 51.9                        | -               | -                              |

<sup>a</sup> ML-1: the first step of mass loss for water desorption;

<sup>b</sup> ML-2: the second step of mass loss for PEGDA carbonization;

<sup>c</sup> FW: Final weight at 750 °C;

<sup>d</sup> FWC: Theoretical final weight taking into account the water content of fillers

**Table S4. Bear-loading test results on calcined samples. Weight supported by the pellets without cracks.**

|                   | Calcination Time |       |       |
|-------------------|------------------|-------|-------|
|                   | 2h               | 4h    | 8h    |
| <b>Z30A30D0</b>   | N.M.             | 100 g | 300 g |
| <b>Z30A30D1.6</b> | N.M.             | N.M.  | 300 g |
| <b>Z30A30D3.3</b> | 200 g            | 200 g | 300 g |
| <b>Z30A30D4.8</b> | N.M.             | N.M.  | 300 g |
| <b>Z30A30D6.6</b> | N.M.             | 200 g | 300 g |
| <b>Z45A15D0</b>   | N.M.             | 200 g | 300 g |
| <b>Z45A15D1.6</b> | N.M.             | N.M.  | 300 g |
| <b>Z45A15D3.3</b> | 200 g            | 200 g | 300 g |
| <b>Z45A15D4.8</b> | N.M.             | N.M.  | 300 g |
| <b>Z45A15D6.6</b> | N.M.             | 200 g | 300 g |
| <b>Z60A0D0</b>    | N.M.             | 100 g | 300 g |
| <b>Z60A0D1.6</b>  | N.M.             | N.M.  | 300 g |
| <b>Z60A0D3.3</b>  | 100 g            | 200 g | 300 g |
| <b>Z60A0D4.8</b>  | N.M.             | N.M.  | 300 g |
| <b>Z60A0D6.6</b>  | N.M.             | 200 g | 300 g |

N.M.: The measurement was not performed.



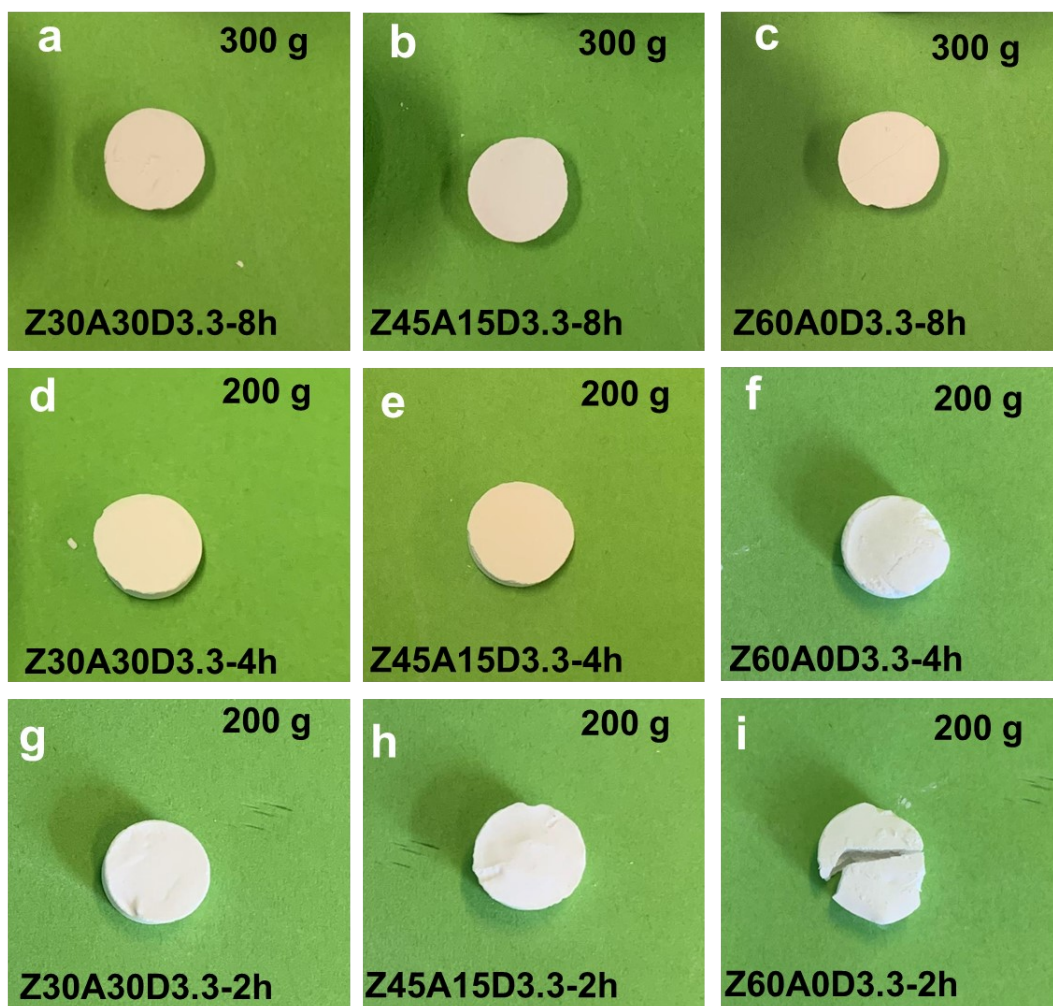

Figure S2. Bear-loading test on calcined samples (a) Z30A30D3.3-8h, (b) Z45A15D3.3-8h, (c) Z60A0D3.3-8h, (d) Z30A30D3.3-4h, (e) Z45A15D3.3-4h, (f) Z60A0D3.3-4h, (g) Z30A30D3.3-2h, (h) Z45A15D3.3-2h, (i) Z60A0D3.3-2h.

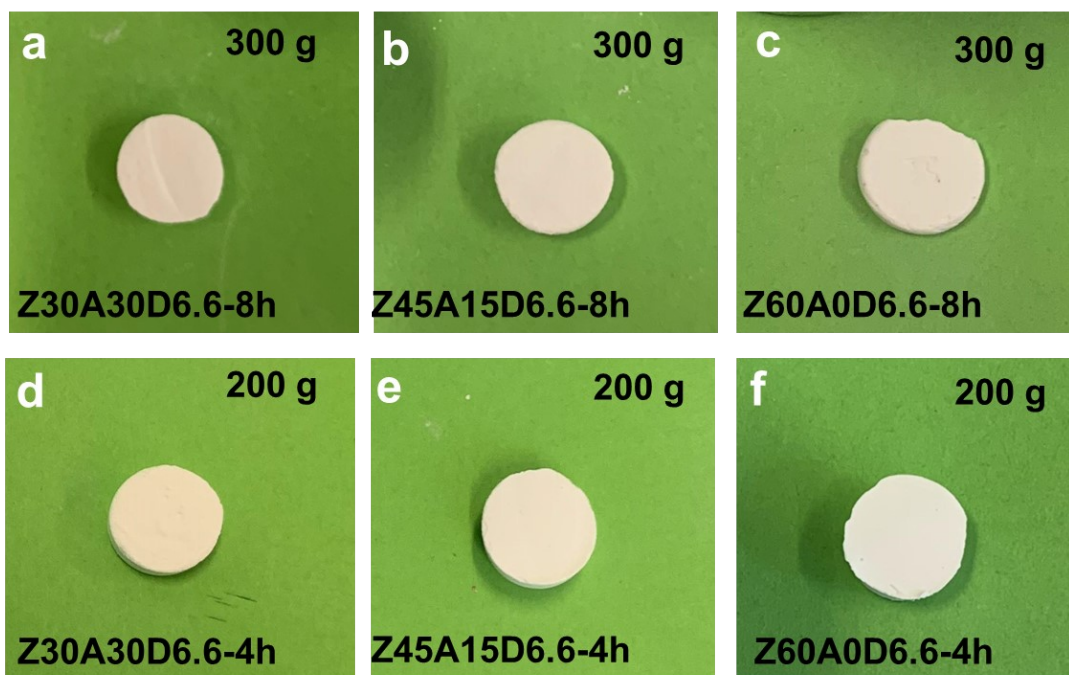

Figure S3. Bear-loading test on calcined samples (a) Z30A30D6.6-8h, (b) Z45A15D6.6-8h, (c) Z60A0D6.6-8h, (d) Z30A30D6.6-4h, (e) Z45A15D6.6-4h, (f) Z60A0D6.6-4h.

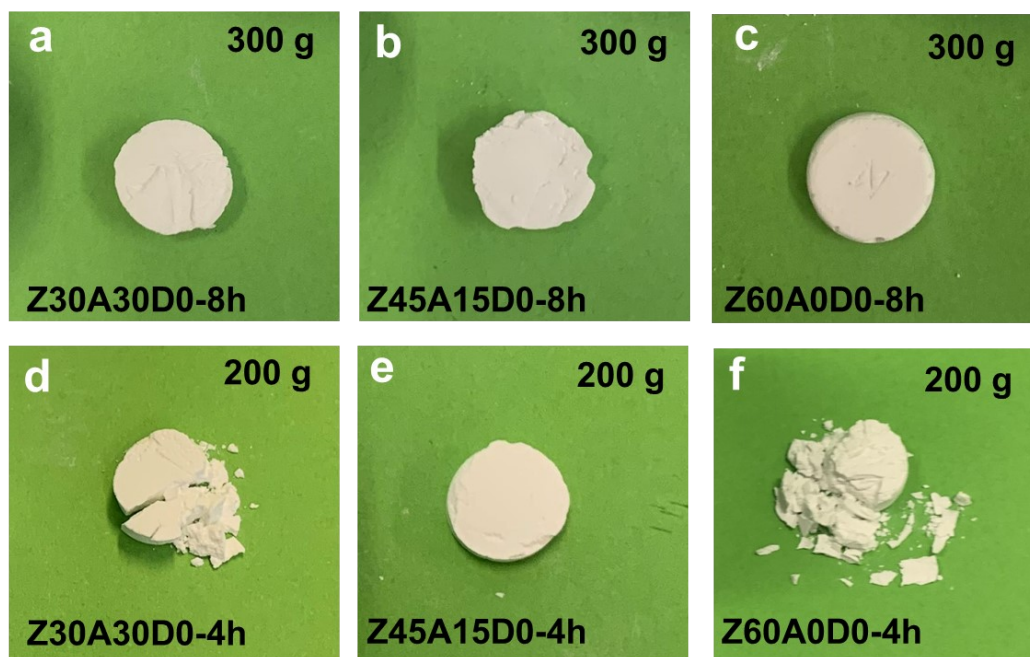

Figure S4. Bear-loading test on calcined samples (a) Z30A30D0-8h, (b) Z45A15D0-8h, (c) Z60A0D0-8h, (d) Z30A30D0-4h, (e) Z45A15D0-4h, (f) Z60A0D0-4h.

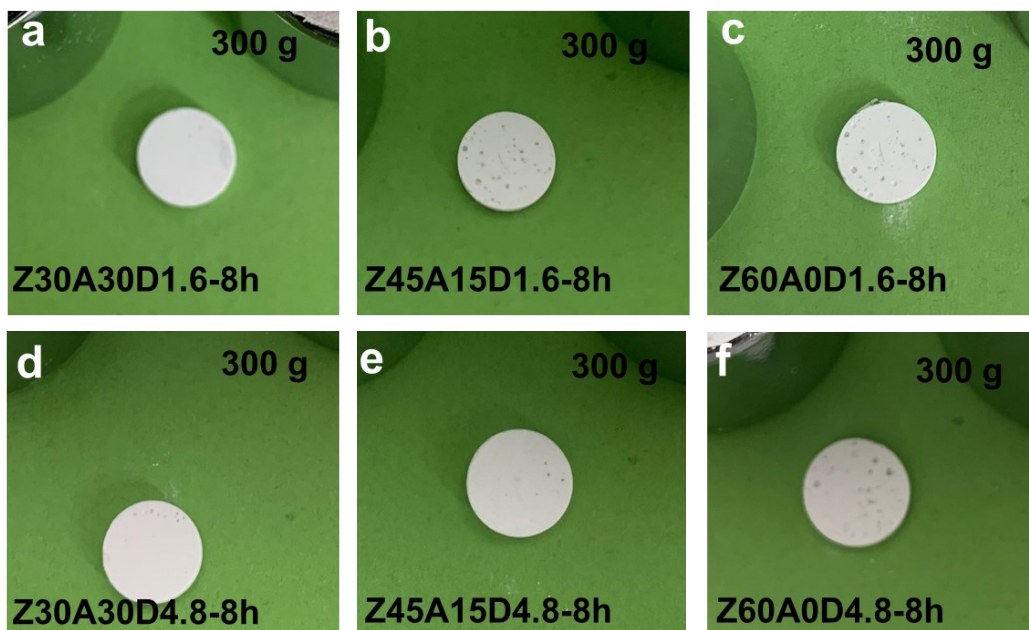

Figure S5. Bear-loading test on calcined samples (a) Z30A30D1.6-8h, (b) Z45A15D1.6-8h, (c) Z60A0D1.6-8h, (d) Z30A30D4.8-8h, (e) Z45A15D4.8-8h, (f) Z60A0D4.8-8h.

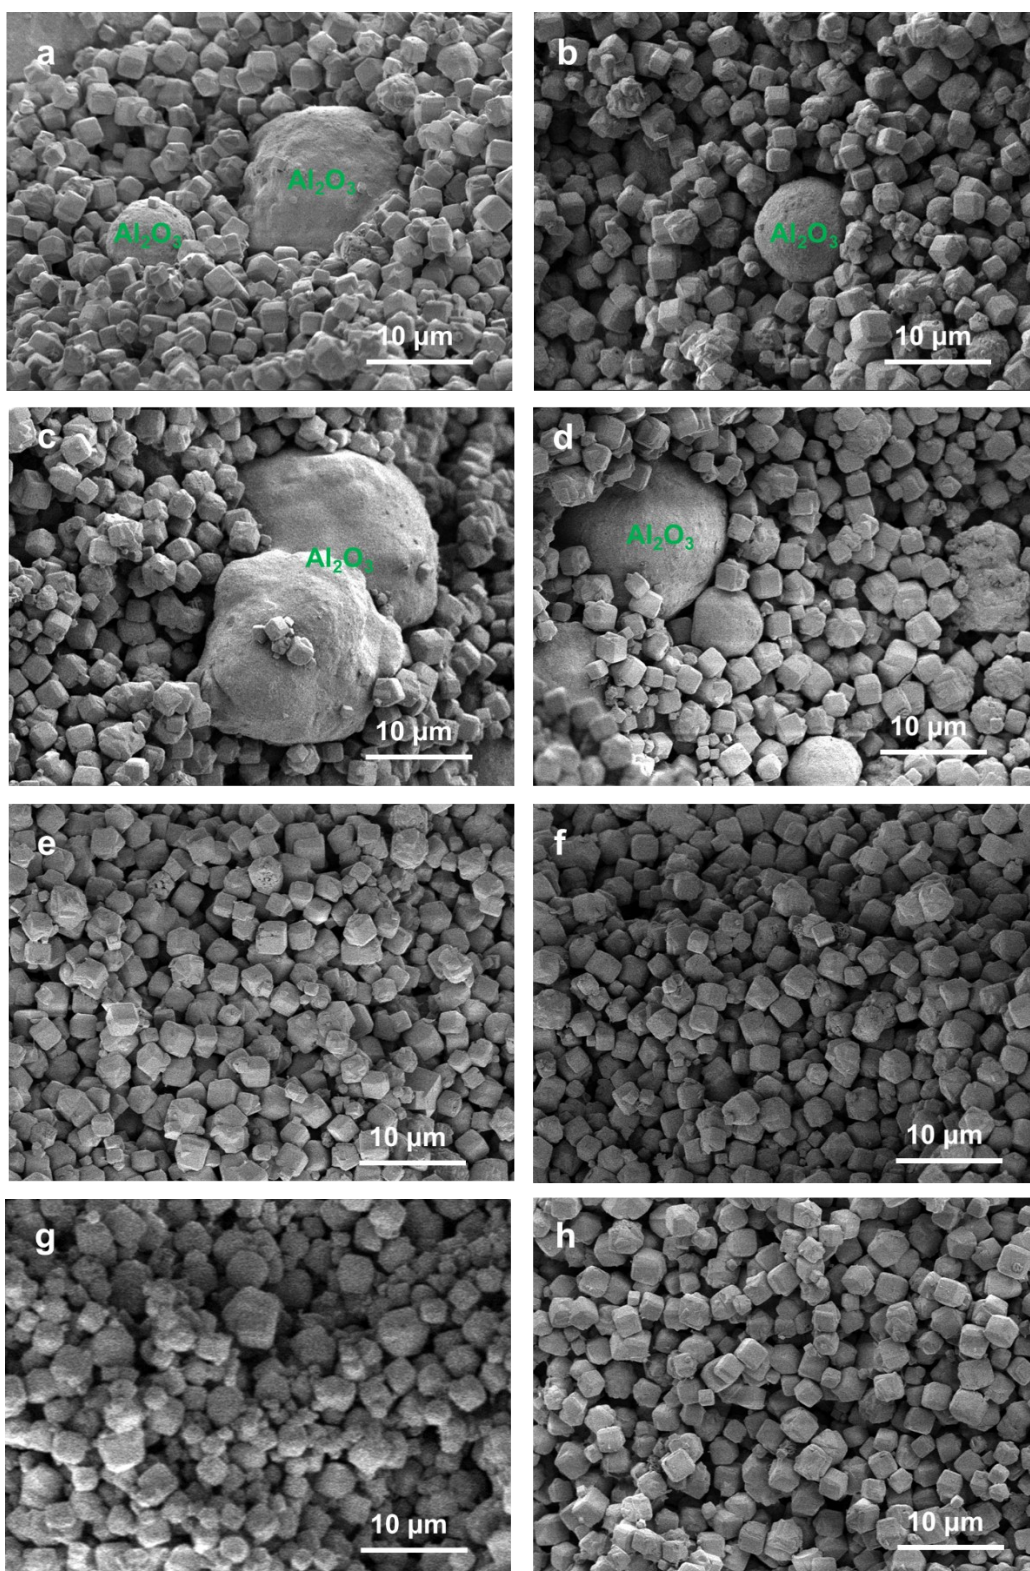

**Figure S6.** SEM images for the cross-section of calcinated samples: (a) Z45A15D3.3-1h; (b) Z45A15D3.3-2h; (c) Z45A15D3.3-4h; (d) Z45A15D3.3-8h; (e) Z60A0D3.3-1h; (f) Z60A0D3.3-2h; (g) Z60A0D3.3-4h; (h) Z60A0D3.3-8h.
